# Supplementary material for: Association of 18 Confirmed Susceptibility Loci for Type 2 Diabetes With Indices of Insulin Release, Proinsulin Conversion, and Insulin Sensitivity in 5,327 Nondiabetic Finnish Men
Source: Oxford University Press journal article supplement (doi:10.2337/db09-0117), 2009-06-05
Supplement: db09-0117_online_appendix.doc [file db09-0117_online_appendix.doc]

**Supplementary Table 1**: Associations of 18 SNPs with early-phase insulin release (InsAUC0-30/GluAUC0-30), proinsulin conversion (ProinsAUC0-30/InsAUC0-30), insulin sensitivity (Matsuda ISI), and disposition index (DI= InsAUC0-30/GluAUC0-30 x Matsuda ISI) in subjects with normal glucose tolerance.

| Gene | Alleles | **InsAUC0-30 / GluAUC0-30** | | | **ProinsAUC0-30 / InsAUC0-30** | | | **Matsuda ISI** | | | **Disposition index** | | |
| --- | --- | --- | --- | --- | --- | --- | --- | --- | --- | --- | --- | --- | --- |
| SNP | MAF (%) | Effect size B (SE) | P | P* | Effect size B (SE) | P | P* | Effect size B (SE) | P | P† | Effect size B (SE) | P | P† |
| ***PPARG*** rs1801282 | C/G 15.5 | 0.86 (0.69) | 0.297 | 0.830 | 0.46 (0.43) | 0.566 | 0.113 | -0.18 (0.14) | 0.154 | 0.047 | -1.07 (2.42) | 0.581 | 0.535 |
| ***KCNJ11*** rs5219 | G/A 47.7 | -1.11 (0.50) | 0.001 | 0.065 | 0.15 (0.32) | 0.429 | 0.763 | 0.31 (0.10) | 0.007 | 0.017 | -1.52 (1.71) | 0.266 | 0.193 |
| ***TCF7L2*** rs7903146 | C/T 17.7 | -1.62 (0.65) | 0.001 | 0.015 | 0.53 (0.41) | 0.025 | 0.030 | 0.30 (0.13) | 0.023 | 0.268 | -4.14 (2.29) | 0.077 | 0.032 |
| ***SLC30A8*** rs13266634 | C/T 39.1 | -0.94 (0.50) | 0.013 | 0.006 | 0.60 (0.32) | **1.1E-05** | **2.8E-04** | 0.08 (0.10) | 0.278 | 0.391 | -3.36 (1.75) | 0.017 | 0.012 |
| ***HHEX*** rs1111875 | C/T 46.9 | -2.74 (0.49) | **7.5E-09** | **1.1E-13** | 0.73 (0.31) | **9.2E-05** | **1.2E-04** | 0.16 (0.10) | 0.074 | 0.031 | -10.7 (1.72) | **1.5E-11** | **9.8E-12** |
| ***LOC387761*** rs7480010 | A/G 17.5 | -0.20 (0.65) | 0.986 | 0.201 | -0.14 (0.42) | 0.973 | 0.175 | 0.14 (0.13) | 0.354 | 0.614 | 3.32 (2.30) | 0.141 | 0.176 |
| ***CDKN2B*** rs10811661 | A/G 14.5 | -1.22 (0.68) | 0.032 | 0.026 | 0.39 (0.44) | 0.186 | 0.282 | 0.12 (0.14) | 0.295 | 0.078 | -4.31 (2.32) | 0.057 | 0.071 |
| ***IGF2BP2*** rs4402960 | C/A 32.1 | -1.28 (0.53) | 0.021 | 0.002 | -0.13 (0.34) | 0.791 | 0.712 | 0.06 (0.11) | 0.535 | 0.428 | -5.62 (1.86) | 0.005 | 0.005 |
| ***CDKAL1*** rs7754840 | G/C 37.0 | -1.78 (0.52) | **1.4E-04** | 0.002 | 0.65 (0.33) | 0.003 | 0.012 | 0.23 (0.11) | 0.018 | 0.046 | -4.50 (1.81) | 0.014 | 0.007 |
| ***WFS1*** rs10010131 | G/A 45.0 | -0.43 (0.49) | 0.343 | 0.864 | 0.37 (0.32) | 0.712 | 0.590 | 0.14 (0.10) | 0.189 | 0.178 | 1.25 (1.73) | 0.624 | 0.656 |
| ***JAZF1*** rs864745 | A/G 48.5 | 0.53 (0.49) | 0.392 | 0.703 | -0.33 (0.32) | 0.269 | 0.244 | -0.08 (0.10) | 0.417 | 0.303 | 0.28 (1.74) | 0.864 | 0.873 |
| ***CDC123*** rs12779790 | A/G 21.5 | -0.82 (0.60) | 0.103 | 0.197 | -0.16 (0.38) | 0.888 | 0.698 | 0.12 (0.12) | 0.281 | 0.612 | -1.73 (2.11) | 0.339 | 0.171 |
| ***TSPAN8*** rs7961581 | A/G 19.4 | 0.11 (0.61) | 0.787 | 0.187 | -0.04 (0.39) | 0.249 | 0.749 | -0.20 (0.13) | 0.196 | 0.016 | -2.23 (2.16) | 0.114 | 0.074 |
| ***THADA*** rs7578597 | A/G 5.0 | -2.21 (1.12) | 0.369 | 0.395 | -1.53 (0.71) | 0.568 | 0.317 | 0.11 (0.23) | 0.620 | 0.573 | -2.49 (3.94) | 0.483 | 0.474 |
| ***ADAMTS9*** rs4607103 | G/A 26.1 | -0.95 (0.57) | 0.254 | 0.096 | 0.04 (0.36) | 0.056 | 0.048 | -0.07 (0.12) | 0.830 | 0.494 | -2.93 (1.99) | 0.117 | 0.137 |
| ***NOTCH2*** rs10923931 | C/A 13.8 | -0.90 (0.71) | 0.151 | 0.632 | -0.40 (0.46) | 0.639 | 0.544 | 0.12 (0.15) | 0.159 | 0.274 | -1.13 (2.50) | 0.912 | 0.808 |
| ***KCNQ1*** rs2283228 | A/C 6.2 | -0.78 (1.01) | 0.195 | 0.123 | 0.46 (0.64) | 0.172 | 0.209 | 0.19 (0.21) | 0.632 | 0.182 | -3.63 (3.55) | 0.165 | 0.218 |
| ***MTNR1B*** rs10830963 | C/G 36.0 | -1.70 (0.51) | **2.1E-04** | **7.9E-07** | 0.11 (0.33) | 0.186 | 0.251 | 0.10 (0.11) | 0.324 | 0.908 | -8.25 (1.80) | **6.3E-06** | **1.2E-06** |

Effect size shown is B-coefficient (SE) per copy of the type 2 diabetes risk allele, and was calculated using untransformed variables adjusted for age by linear regression. *P* values were calculated using log-transformed variables (due to their skewed distribution) by linear regression. *P* values are adjusted for age; *P** values are adjusted for age, BMI, and Matsuda ISI; *P*† values are adjusted for age and BMI. In the entire cohort, meansSE of examined parameters and number of subjects with available data were as follows: InsAUC0-30/GluAUC0-30 30.50.35 pmol/mmol (N=3577), ProinsAUC0-30/InsAUC0-30 12.10.22 (N=1981), Matsuda ISI 7.990.07 [mg/dl, mU/l] (N=3575), and DI 188.51.2 (N=3575). *P* values significant after the correction for multiple testing (*P*<6.9x10-4) are in bold. Risk alleles are underlined. Results for the additive model are presented.

**Supplementary Table 2**: Associations of 18 SNPs with early-phase insulin release (InsAUC0-30/GluAUC0-30), proinsulin conversion (ProinsAUC0-30/InsAUC0-30), insulin sensitivity (Matsuda ISI), and disposition index (DI= InsAUC0-30/GluAUC0-30 x Matsuda ISI) in non-diabetic subjects and subjects with newly diagnosed type 2 diabetes combined

| Gene | Alleles | **InsAUC0-30 / GluAUC0-30** | | | **ProinsAUC0-30 / InsAUC0-30** | | | **Matsuda ISI** | | | **Disposition index** | | |
| --- | --- | --- | --- | --- | --- | --- | --- | --- | --- | --- | --- | --- | --- |
| SNP | MAF (%) | Effect size B (SE) | P | P* | Effect size B (SE) | P | P* | Effect size B (SE) | P | P† | Effect size B (SE) | P | P† |
| ***PPARG*** rs1801282 | C/G 15.5 | 0.34 (0.54) | 0.553 | 0.756 | 0.32 (0.45) | 0.578 | 0.316 | -0.13 (0.11) | 0.267 | 0.010 | -1.47 (1.99) | 0.453 | 0.193 |
| ***KCNJ11*** rs5219 | G/A 47.7 | -1.05 (0.39) | 0.001 | 0.012 | 0.42 (0.32) | 0.123 | 0.305 | 0.21 (0.08) | 0.025 | 0.023 | -1.51 (1.40) | 0.265 | 0.164 |
| ***TCF7L2*** rs7903146 | C/T 17.7 | -1.97 (0.50) | **1.1E-06** | **3.5E-09** | 0.96 (0.42) | **1.2E-04** | **1.5E-05** | 0.08 (0.10) | 0.380 | 0.523 | -7.89 (1.85) | **3.0E-06** | **1.4E-08** |
| ***SLC30A8*** rs13266634 | C/T 39.1 | -0.83 (0.40) | 0.006 | **5.5E-04** | 0.81 (0.33) | **1.2E-05** | **4.6E-06** | 0.01 (0.08) | 0.749 | 0.614 | -3.91 (1.45) | 0.005 | 0.001 |
| ***HHEX*** rs1111875 | C/T 46.9 | -2.47 (0.38) | **4.0E-11** | **2.1E-13** | 0.85 (0.32) | **1.3E-05** | **8.2E-06** | 0.14 (0.08) | 0.065 | 0.074 | -8.75 (1.41) | **3.3E-08** | **1.8E-09** |
| ***LOC387761*** rs7480010 | A/G 17.5 | -0.57 (0.52) | 0.445 | 0.506 | -0.10 (0.44) | 0.965 | 0.380 | 0.18 (0.10) | 0.066 | 0.409 | 3.66 (1.89) | 0.135 | 0.348 |
| ***CDKN2B*** rs10811661 | A/G 14.5 | -1.18 (0.55) | 0.009 | **2.3E-04** | 0.39 (0.47) | 0.210 | 0.131 | -0.02 (0.11) | 0.902 | 0.367 | -6.28 (1.99) | 0.001 | 0.003 |
| ***IGF2BP2*** rs4402960 | C/A 32.1 | -1.38 (0.41) | 0.002 | 0.003 | 0.21 (0.35) | 0.209 | 0.350 | 0.07 (0.08) | 0.195 | 0.476 | -4.07 (1.52) | 0.047 | 0.013 |
| ***CDKAL1*** rs7754840 | G/C 37.0 | -1.84 (0.40) | **9.0E-07** | **2.3E-08** | 0.54 (0.34) | **3.0E-05** | **1.0E-04** | 0.09 (0.08) | 0.238 | 0.276 | -5.97 (1.47) | **1.7E-05** | **2.7E-06** |
| ***WFS1*** rs10010131 | G/A 45.0 | -0.72 (0.39) | 0.011 | 0.046 | -0.00 (0.33) | 0.649 | 0.219 | 0.12 (0.08) | 0.100 | 0.102 | -0.63 (1.43) | 0.346 | 0.239 |
| ***JAZF1*** rs864745 | A/G 48.5 | -0.02 (0.39) | 0.958 | 0.483 | 0.01 (0.33) | 0.531 | 0.361 | -0.08 (0.08) | 0.423 | 0.264 | -1.12 (1.42) | 0.331 | 0.277 |
| ***CDC123*** rs12779790 | A/G 21.5 | -0.95 (0.47) | 0.013 | 0.002 | 0.04 (0.39) | 0.246 | 0.218 | 0.02 (0.09) | 0.681 | 0.246 | -3.65 (1.71) | 0.016 | 0.001 |
| ***TSPAN8*** rs7961581 | A/G 19.4 | 0.07 (0.49) | 0.728 | 0.526 | -0.40 (0.41) | 0.091 | 0.157 | -0.17 (0.10) | 0.248 | 0.008 | -1.57 (1.78) | 0.286 | 0.101 |
| ***THADA*** rs7578597 | A/G 5.0 | -2.16 (0.90) | 0.125 | 0.045 | -0.81 (0.74) | 0.860 | 0.856 | -0.00 (0.18) | 0.927 | 0.556 | -5.32 (3.28) | 0.085 | 0.109 |
| ***ADAMTS9*** rs4607103 | G/A 26.1 | -0.80 (0.45) | 0.084 | 0.020 | -0.12 (0.37) | 0.069 | 0.059 | -0.05 (0.09) | 0.947 | 0.776 | -3.01 (1.63) | 0.045 | 0.043 |
| ***NOTCH2*** rs10923931 | C/A 13.8 | -0.57 (0.56) | 0.200 | 0.855 | -1.01 (0.48) | 0.340 | 0.119 | 0.14 (0.11) | 0.104 | 0.062 | 0.82 (2.07) | 0.547 | 0.564 |
| ***KCNQ1*** rs2283228 | A/C 6.2 | -1.10 (0.81) | 0.143 | 0.055 | 0.52 (0.66) | 0.122 | 0.271 | 0.04 (0.16) | 0.940 | 0.416 | -4.29 (2.96) | 0.096 | 0.151 |
| ***MTNR1B*** rs10830963 | C/G 36.0 | -1.96 (0.40) | **1.2E-07** | **1.9E-11** | -0.19 (0.33) | 0.342 | 0.219 | 0.03 (0.08) | 0.512 | 0.552 | -9.26 (1.46) | **3.6E-08** | **1.6E-10** |

Effect size shown is B-coefficient (SE) per copy of the type 2 diabetes risk allele, and was calculated using untransformed variables adjusted for age by linear regression. *P* values were calculated using log-transformed variables (due to their skewed distribution) by linear regression. *P* values are adjusted for age; *P** values are adjusted for age, BMI, and Matsuda ISI; *P*† values are adjusted for age and BMI. In the entire cohort, meansSE of examined parameters and the number of subjects with available data were as follows: InsAUC0-30/GluAUC0-30 30.00.27 pmol/mmol (N=5736), ProinsAUC0-30/InsAUC0-30 13.00.23 (N=2882), Matsuda ISI 6.760.06 [mg/dl, mU/l] (N=5731), and DI 155.81.0 (N=5731). *P* values significant after correction for multiple testing (*P*<6.9x10-4) are in bold. Risk alleles are underlined. Results for the additive model are presented.
